# Supplementary material for: Humoral Immunogenicity and Reactogenicity of the Standard ChAdOx1 nCoV-19 Vaccination in Taiwan
Source: MDPI journal article supplement (doi:10.3390/vaccines10020312), 2022-02-17
Supplement: s1 [file s1]

# Humoral immunogenicity and reactogenicity of the standard ChAdOx1 nCoV-19 vaccination in Taiwan, an Asian island with extremely low COVID prevalence

**Table S1. Anti-RBD IgG (IVD) levels at different time points before and after vaccination**

|                        | PD0      |             | PD14     |                | BD28     |                 | <i>p</i> -value <sup>a</sup> | <i>p</i> -value <sup>b</sup> | <i>p</i> -value <sup>c</sup> |
|------------------------|----------|-------------|----------|----------------|----------|-----------------|------------------------------|------------------------------|------------------------------|
|                        | <i>n</i> | Mean (SD)   | <i>n</i> | Mean (SD)      | <i>n</i> | Mean (SD)       |                              |                              |                              |
| All participants       | 270      | 0.85 (0.88) | 243      | 45.02 (85.32)  | 270      | 172.87 (170.36) | <0.0001                      | <0.0001                      | <0.0001                      |
| Gender                 |          |             |          |                |          |                 |                              |                              |                              |
| Female                 | 169      | 0.91 (1.00) | 153      | 45.78 (57.20)  | 169      | 181.08 (179.18) | <0.0001                      | <0.0001                      | <0.0001                      |
| Male                   | 101      | 0.77 (0.61) | 90       | 43.75 (119.18) | 101      | 159.12 (154.38) | 0.0010                       | <0.0001                      | <0.0001                      |
| Age, year              |          |             |          |                |          |                 |                              |                              |                              |
| 20–29                  | 79       | 0.75 (0.59) | 66       | 52.95 (57.91)  | 79       | 174.48 (117.23) | <0.0001                      | <0.0001                      | <0.0001                      |
| 30–39                  | 75       | 0.83 (0.64) | 69       | 40.31 (53.07)  | 75       | 156.69 (156.84) | <0.0001                      | <0.0001                      | <0.0001                      |
| 40–49                  | 61       | 0.89 (1.33) | 57       | 60.80 (149.73) | 61       | 183.41 (184.36) | 0.0038                       | <0.0001                      | <0.0001                      |
| 50+                    | 55       | 1.02 (0.87) | 51       | 23.51 (32.66)  | 55       | 180.92 (229.56) | <0.0001                      | <0.0001                      | <0.0001                      |
| BMI, kg/m <sup>2</sup> |          |             |          |                |          |                 |                              |                              |                              |
| <24                    | 153      | 0.93 (1.05) | 135      | 40.86 (48.44)  | 153      | 158.70 (137.60) | <0.0001                      | <0.0001                      | <0.0001                      |
| 24–27                  | 58       | 0.86 (0.71) | 53       | 61.14 (152.96) | 58       | 224.11 (262.49) | 0.0059                       | <0.0001                      | <0.0001                      |
| >27                    | 59       | 0.68 (0.38) | 55       | 39.71 (62.79)  | 59       | 159.25 (118.02) | <0.0001                      | <0.0001                      | <0.0001                      |
| CCM history            |          |             |          |                |          |                 |                              |                              |                              |
| No                     | 190      | 0.88 (0.94) | 171      | 39.52 (49.70)  | 189      | 159.39 (159.29) | <0.0001                      | <0.0001                      | <0.0001                      |
| Yes                    | 80       | 0.83 (0.71) | 72       | 58.10 (136.57) | 80       | 206.02 (191.74) | 0.0007                       | <0.0001                      | <0.0001                      |

Note: PD0: day 0 before the prime vaccination; PD14: 14 days after the prime vaccination; BD28: 28 days after the boost vaccination. BMI: body mass index; CCM: chronic comorbidities; SD: standard deviation. The positive immune response is  $\geq 7$  BAU/mL. <sup>a</sup>PD0 v.s. PD14; <sup>b</sup>PD14 v.s. BD28; <sup>c</sup>PD0 v.s. BD28. (Unit: BAU/mL)

**Table S2. Anti-spike IgG levels at different time points before and after vaccination**

|                        | PD0      |               | PD14     |               | BD28     |                | <i>p</i> -value <sup>a</sup> | <i>p</i> -value <sup>b</sup> | <i>p</i> -value <sup>c</sup> |
|------------------------|----------|---------------|----------|---------------|----------|----------------|------------------------------|------------------------------|------------------------------|
|                        | <i>n</i> | Mean (SD)     | <i>n</i> | Mean (SD)     | <i>n</i> | Mean (SD)      |                              |                              |                              |
| All participants       | 91       | 23.67 (19.74) | 91       | 64.40 (42.96) | 270      | 179.30 (76.88) | <0.0001                      | <0.0001                      | <0.0001                      |
| Gender                 |          |               |          |               |          |                |                              |                              |                              |
| Female                 | 56       | 25.23 (21.22) | 56       | 64.27 (42.36) | 169      | 186.79 (77.98) | <0.0001                      | <0.0001                      | <0.0001                      |
| Male                   | 35       | 21.18 (17.10) | 35       | 64.59 (44.52) | 101      | 166.76 (73.69) | <0.0001                      | <0.0001                      | <0.0001                      |
| Age, years             |          |               |          |               |          |                |                              |                              |                              |
| 20–29                  | 26       | 25.83 (20.82) | 26       | 73.53 (38.29) | 79       | 182.82 (66.92) | <0.0001                      | <0.0001                      | <0.0001                      |
| 30–39                  | 24       | 24.45 (19.87) | 24       | 72.20 (52.38) | 75       | 177.74 (63.52) | <0.0001                      | <0.0001                      | <0.0001                      |
| 40–49                  | 19       | 29.87 (22.77) | 19       | 65.46 (42.11) | 61       | 178.09 (84.96) | 0.0005                       | <0.0001                      | <0.0001                      |
| 50+                    | 22       | 14.93 (12.45) | 22       | 44.17 (32.17) | 55       | 177.69 (96.96) | <0.0001                      | <0.0001                      | <0.0001                      |
| BMI, kg/m <sup>2</sup> |          |               |          |               |          |                |                              |                              |                              |
| <24                    | 47       | 21.18 (18.51) | 47       | 61.11 (44.29) | 153      | 170.77 (66.92) | <0.0001                      | <0.0001                      | <0.0001                      |
| 24–27                  | 25       | 22.72 (18.32) | 25       | 74.23 (42.41) | 58       | 198.89 (97.01) | <0.0001                      | <0.0001                      | <0.0001                      |
| >27                    | 19       | 31.11 (23.41) | 19       | 59.59 (40.36) | 59       | 182.14 (76.46) | 0.0045                       | <0.0001                      | <0.0001                      |
| CCM history            |          |               |          |               |          |                |                              |                              |                              |
| No                     | 65       | 19.76 (17.34) | 65       | 61.18 (43.71) | 190      | 173.62 (75.63) | <0.0001                      | <0.0001                      | <0.0001                      |
| Yes                    | 26       | 33.45 (22.20) | 26       | 72.43 (40.71) | 80       | 192.79 (78.62) | <0.0001                      | <0.0001                      | <0.0001                      |

Note: PD0: day 0 before the prime vaccination; PD14: 14 days after the prime vaccination; BD28: 28 days after the boost vaccination. Tests were conducted randomly in one-third of blood specimens collected at PD0 and PD14 (91/270). BMI: body mass index; CCM: chronic comorbidities; SD: standard deviation. The positive immune response is  $\geq 78.31$  BAU/mL. <sup>a</sup>PD0 v.s. PD14; <sup>b</sup>PD14 v.s. BD28; <sup>c</sup>PD0 v.s. BD28. (Unit: BAU/mL)

**Table S3. Subgroup analyses of NT50 levels after the prime-boost vaccination**

|                        | <i>n</i> | Mean (SD)       |               | <i>p</i> -value | GM (95% CI)         |                     | <i>p</i> -value |
|------------------------|----------|-----------------|---------------|-----------------|---------------------|---------------------|-----------------|
|                        |          | Titer           | IU/mL         |                 | Titer               | IU/mL               |                 |
| All participants       | 270      | 308.76 (291.23) | 187.7 (185.2) |                 | 223.4 (202.5–246.5) | 132.9 (120.0–147.1) |                 |
| Gender                 |          |                 |               | 0.069           |                     |                     | 0.089           |
| Female                 | 169      | 331.66 (323.26) | 202.1 (206.4) |                 | 238.7 (210.6–270.5) | 142.2 (125.0–161.9) |                 |
| Male                   | 101      | 270.44 (224.13) | 163.4 (140.6) |                 | 200.1 (170.6–234.8) | 118.6 (100.5–139.8) |                 |
| Age, years             |          |                 |               | 0.435           |                     |                     | 0.0163          |
| 20–29                  | 79       | 351.22 (362.75) | 214.4 (233.6) |                 | 267.0 (228.3–312.2) | 159.7 (135.9–187.8) |                 |
| 30–39                  | 75       | 300.81 (255.74) | 182.4 (161.6) |                 | 229.8 (194.0–272.1) | 136.8 (114.8–162.9) |                 |
| 40–49                  | 61       | 296.78 (228.85) | 179.8 (143.2) |                 | 220.9 (179.5–271.7) | 131.3 (106.0–162.7) |                 |
| 50+                    | 55       | 271.89 (283.46) | 165.1 (178.4) |                 | 168.7 (127.8–222.8) | 99.4 (74.58–132.5)  |                 |
| BMI, kg/m <sup>2</sup> |          |                 |               | 0.685           |                     |                     | 0.793           |
| <24                    | 153      | 314.44 (330.26) | 191.5 (211.2) |                 | 223.4 (196.0–254.7) | 132.8 (116.0–152.1) |                 |
| 24–27                  | 58       | 322.65 (262.68) | 196.1 (165.3) |                 | 235.5 (188.8–293.8) | 140.3 (111.6–176.3) |                 |
| >27                    | 59       | 280.38 (196.51) | 169.4 (122.3) |                 | 212.3 (171.7–262.5) | 126.1 (101.2–156.9) |                 |
| CCM history            |          |                 |               | 0.516           |                     |                     | 0.477           |
| No                     | 190      | 302.39 (303.13) | 183.2 (193.1) |                 | 218.3 (194.6–245.0) | 129.8 (115.2–146.1) |                 |
| Yes                    | 80       | 326.06 (262.29) | 198.3 (165.6) |                 | 236.1 (194.9–285.9) | 140.6 (115.4–171.5) |                 |

Note: NT50: 50% Neutralizing antibody titer or concentration (IU/mL) was defined as the reciprocal of the highest dilution capable of inhibiting 50% of cytopathic effect. BMI: body mass index; CCM: chronic comorbidities; SD: standard deviation; GM: geometric mean; CI: confidence interval.

**Table S4. Platelet counts at different time points before and after vaccination**

|                        | PD0      |                | PD14     |                | BD28     |                | <i>p</i> -value <sup>a</sup> | <i>p</i> -value <sup>b</sup> | <i>p</i> -value <sup>c</sup> |
|------------------------|----------|----------------|----------|----------------|----------|----------------|------------------------------|------------------------------|------------------------------|
|                        | <i>n</i> | Mean (SD)      | <i>n</i> | Mean (SD)      | <i>n</i> | Mean (SD)      |                              |                              |                              |
| All participants       | 270      | 267.24 (67.91) | 243      | 281.80 (71.78) | 270      | 261.98 (65.19) | 0.0093                       | 0.0011                       | 0.3587                       |
| Gender                 |          |                |          |                |          |                |                              |                              |                              |
| Female                 | 169      | 283.42 (71.50) | 153      | 299.13 (74.85) | 169      | 276.02 (66.94) | 0.0550                       | 0.0037                       | 0.3268                       |
| Male                   | 101      | 240.18 (51.35) | 90       | 252.33 (55.20) | 101      | 238.49 (54.89) | 0.1166                       | 0.0843                       | 0.8216                       |
| Age, years             |          |                |          |                |          |                |                              |                              |                              |
| 20–29                  | 79       | 267.98 (56.00) | 66       | 285.80 (61.96) | 79       | 259.83 (49.25) | 0.0712                       | 0.0056                       | 0.3330                       |
| 30–39                  | 75       | 274.03 (72.70) | 69       | 292.83 (79.50) | 75       | 271.27 (73.66) | 0.1404                       | 0.0933                       | 0.8177                       |
| 40–49                  | 61       | 277.95 (73.54) | 57       | 291.40 (73.10) | 61       | 271.34 (69.21) | 0.3216                       | 0.1283                       | 0.6097                       |
| 50+                    | 55       | 245.05 (67.07) | 51       | 250.97 (64.04) | 55       | 242.02 (65.41) | 0.6436                       | 0.4788                       | 0.8109                       |
| BMI, kg/m <sup>2</sup> |          |                |          |                |          |                |                              |                              |                              |
| <24                    | 153      | 262.48 (58.28) | 135      | 278.02 (65.17) | 153      | 254.01 (55.17) | 0.0335                       | 0.0008                       | 0.1924                       |
| 24–27                  | 58       | 267.25 (63.69) | 53       | 284.38 (67.47) | 58       | 269.35 (63.12) | 0.1717                       | 0.2277                       | 0.8592                       |
| >27                    | 59       | 279.58 (91.04) | 55       | 288.58 (89.87) | 59       | 275.42 (86.09) | 0.5967                       | 0.4262                       | 0.7990                       |
| CCM history            |          |                |          |                |          |                |                              |                              |                              |
| No                     | 190      | 269.73 (64.40) | 171      | 285.06 (68.91) | 190      | 263.14 (60.94) | 0.0296                       | 0.0015                       | 0.3057                       |
| Yes                    | 80       | 261.33 (75.72) | 72       | 274.07 (78.13) | 80       | 259.23 (74.68) | 0.3093                       | 0.2335                       | 0.8605                       |

Note: PD0: day 0 before the prime vaccination; PD14: 14 days after the prime vaccination; BD28: 28 days after the boost vaccination; BMI: body mass index; CCM: chronic comorbidities; SD: standard deviation. <sup>a</sup>PD0 v.s. PD14; <sup>b</sup>PD14 v.s. BD28; <sup>c</sup>PD0 v.s. BD28. (Unit: 10<sup>3</sup>/uL)

**Table S5. D-dimer levels at differ time points before and after vaccination**

|                        | PD0      |             | PD14     |             | BD28     |             | <i>p</i> -value <sup>a</sup> | <i>p</i> -value <sup>b</sup> | <i>p</i> -value <sup>c</sup> |
|------------------------|----------|-------------|----------|-------------|----------|-------------|------------------------------|------------------------------|------------------------------|
|                        | <i>n</i> | Mean (SD)   | <i>n</i> | Mean (SD)   | <i>n</i> | Mean (SD)   |                              |                              |                              |
| All participants       | 270      | 0.34 (0.39) | 242      | 0.32 (0.18) | 270      | 0.36 (0.21) | 0.5190                       | 0.0161                       | 0.3573                       |
| Gender                 |          |             |          |             |          |             |                              |                              |                              |
| Female                 | 169      | 0.34 (0.45) | 153      | 0.33 (0.20) | 169      | 0.37 (0.19) | 0.6466                       | 0.0588                       | 0.5444                       |
| Male                   | 101      | 0.33 (0.26) | 89       | 0.31 (0.16) | 101      | 0.35 (0.25) | 0.5890                       | 0.1360                       | 0.4303                       |
| Age, yr                |          |             |          |             |          |             |                              |                              |                              |
| 20–29                  | 79       | 0.32 (0.29) | 65       | 0.32 (0.18) | 79       | 0.37 (0.26) | 0.9516                       | 0.1703                       | 0.2570                       |
| 30–39                  | 75       | 0.38 (0.63) | 69       | 0.32 (0.16) | 75       | 0.33 (0.12) | 0.4046                       | 0.5350                       | 0.4944                       |
| 40–49                  | 61       | 0.31 (0.10) | 57       | 0.30 (0.09) | 61       | 0.34 (0.11) | 0.5735                       | 0.0269                       | 0.0797                       |
| 50+                    | 55       | 0.33 (0.27) | 51       | 0.35 (0.27) | 55       | 0.41 (0.30) | 0.7569                       | 0.2386                       | 0.1355                       |
| BMI, kg/m <sup>2</sup> |          |             |          |             |          |             |                              |                              |                              |
| <24                    | 153      | 0.36 (0.50) | 134      | 0.32 (0.22) | 153      | 0.37 (0.25) | 0.3963                       | 0.0985                       | 0.8894                       |
| 24–27                  | 58       | 0.31 (0.13) | 53       | 0.31 (0.12) | 58       | 0.32 (0.13) | 0.9941                       | 0.0367                       | 0.5213                       |
| >27                    | 59       | 0.30 (0.12) | 55       | 0.32 (0.13) | 59       | 0.38 (0.17) | 0.3119                       | 0.5179                       | 0.0026                       |
| CCM history            |          |             |          |             |          |             |                              |                              |                              |
| No                     | 190      | 0.35 (0.44) | 170      | 0.32 (0.17) | 190      | 0.35 (0.20) | 0.3861                       | 0.1085                       | 0.9846                       |
| Yes                    | 80       | 0.31 (0.21) | 72       | 0.32 (0.20) | 80       | 0.39 (0.24) | 0.6554                       | 0.0629                       | 0.0208                       |

Note: PD0: day 0 before the prime vaccination; PD14: 14 days after the prime vaccination; BD28: 28 days after the boost vaccination. BMI: body mass index; CCM: chronic comorbidities; SD: standard deviation. <sup>a</sup>PD0 v.s. PD14; <sup>b</sup>PD14 v.s. BD28; <sup>c</sup>PD0 v.s. BD28. (Unit: mg/L)

**Table S6. The association of antibody responses, platelet counts and D-dimer levels with fever after vaccination.**

| <b>Variable</b>               | <b>With Fever (n=141)<br/>Mean (SD)</b> | <b>Without Fever (n=102)<br/>Mean (SD)</b> | <b><i>p</i>-value</b> |
|-------------------------------|-----------------------------------------|--------------------------------------------|-----------------------|
| anti-RBD IgG (BAU/mL)         | 175.67 (147.02)                         | 168.39 (204.20)                            | 0.7467                |
| anti-spike IgG (BAU/mL)       | 186.09 (75.28)                          | 170.89 (81.45)                             | 0.0671                |
| NT50 (IU/mL)                  | 215.20 (212.74)                         | 157.45 (150.38)                            | 0.0196                |
| Platelet ( $\times 10^3$ /uL) | 265.79 (64.28)                          | 259.67 (66.92)                             | 0.472                 |
| D-dimer (mg/L)                | 0.35 (0.17)                             | 0.38 (0.28)                                | 0.292                 |

Note: The participant with fever was defined as who had an episode of body temperature  $\geq 37.5^\circ\text{C}$  after the prime or boost or both doses of vaccine. RBD: receptor binding domain; BAU: binding affinity unit; NT: neutralizing antibody titer; IU: international units; SD: standard deviation.

**Figure S1**

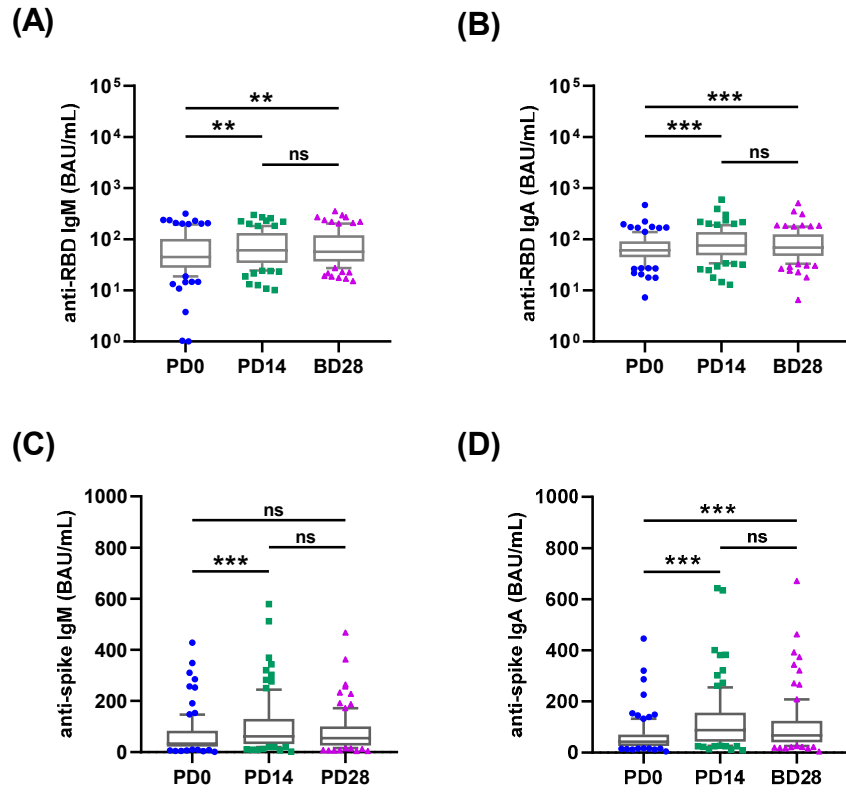

**Figure S1.** Subclass IgM and IgA responses elicited by vaccination. IgA and IgM levels of anti-Spike RBD (A-B) and anti-spike (C-D) were measured randomly by ELISA in one-third of participants (91/270). PD0: day 0 before the prime vaccination; PD14: 14 days after the prime vaccination; BD28: 28 days after the boost vaccination.
